# Supplementary material for: The RIX domain defines a class of polymorphic T6SS effectors and secreted adaptors
Source: PubMed Central journal article supplement (PMC10435454; doi:10.1038/s41467-023-40659-2), 2023-08-17
Supplement: 41467_2023_40659_MOESM1_ESM.pdf [file 41467_2023_40659_MOESM1_ESM.pdf]

## Supplementary Information

The RIX domain defines a class of polymorphic T6SS effectors and secreted  
adaptors

- **Figures S1-S9**
- **Tables S1-S3**
- **References**

## Supplementary Figures

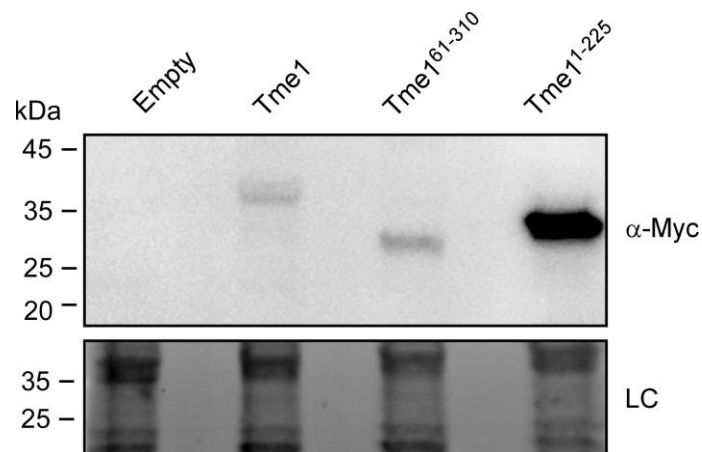

**Fig. S1. Tme1 truncations are expressed in *E. coli*.** Expression of the indicated C-terminal Myc-His tagged Tme1 forms from arabinose-inducible pPER5-based plasmids in *E. coli* BL21 (DE3). Proteins were detected by immunoblotting using specific  $\alpha$ -Myc antibodies. Loading control (LC) is shown for total protein lysates. The experiment was repeated five independent times with similar results. Results from a representative experiment are shown. Source data are provided as a Source Data file.

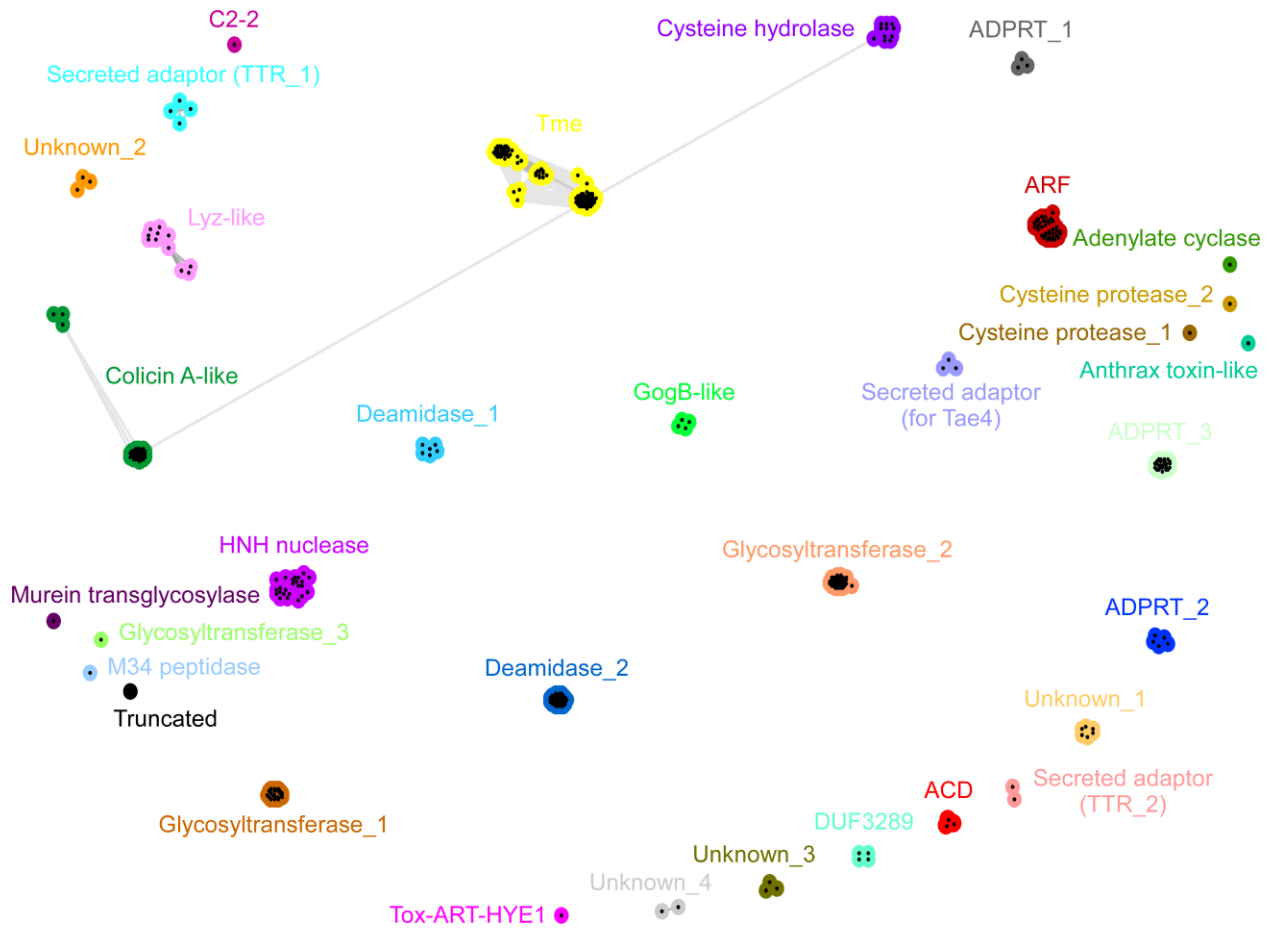

**Fig. S2. RIX domain C-terminal extensions cluster into 33 distinct families.** C-termini of RIX domain-containing proteins clustered in two dimensions. Clustering was performed based on all-against-all sequence similarity, with nodes representing unique sequences and connecting lines representing the distances between sequences. The predicted activities or domains identified in each cluster are denoted. Lyz, lysozyme; ADPRT, ADP ribosyl transferase; ARF, ADP ribosylation factor; ACD, Actin cross-linking; TTR, Transthyretin-like.

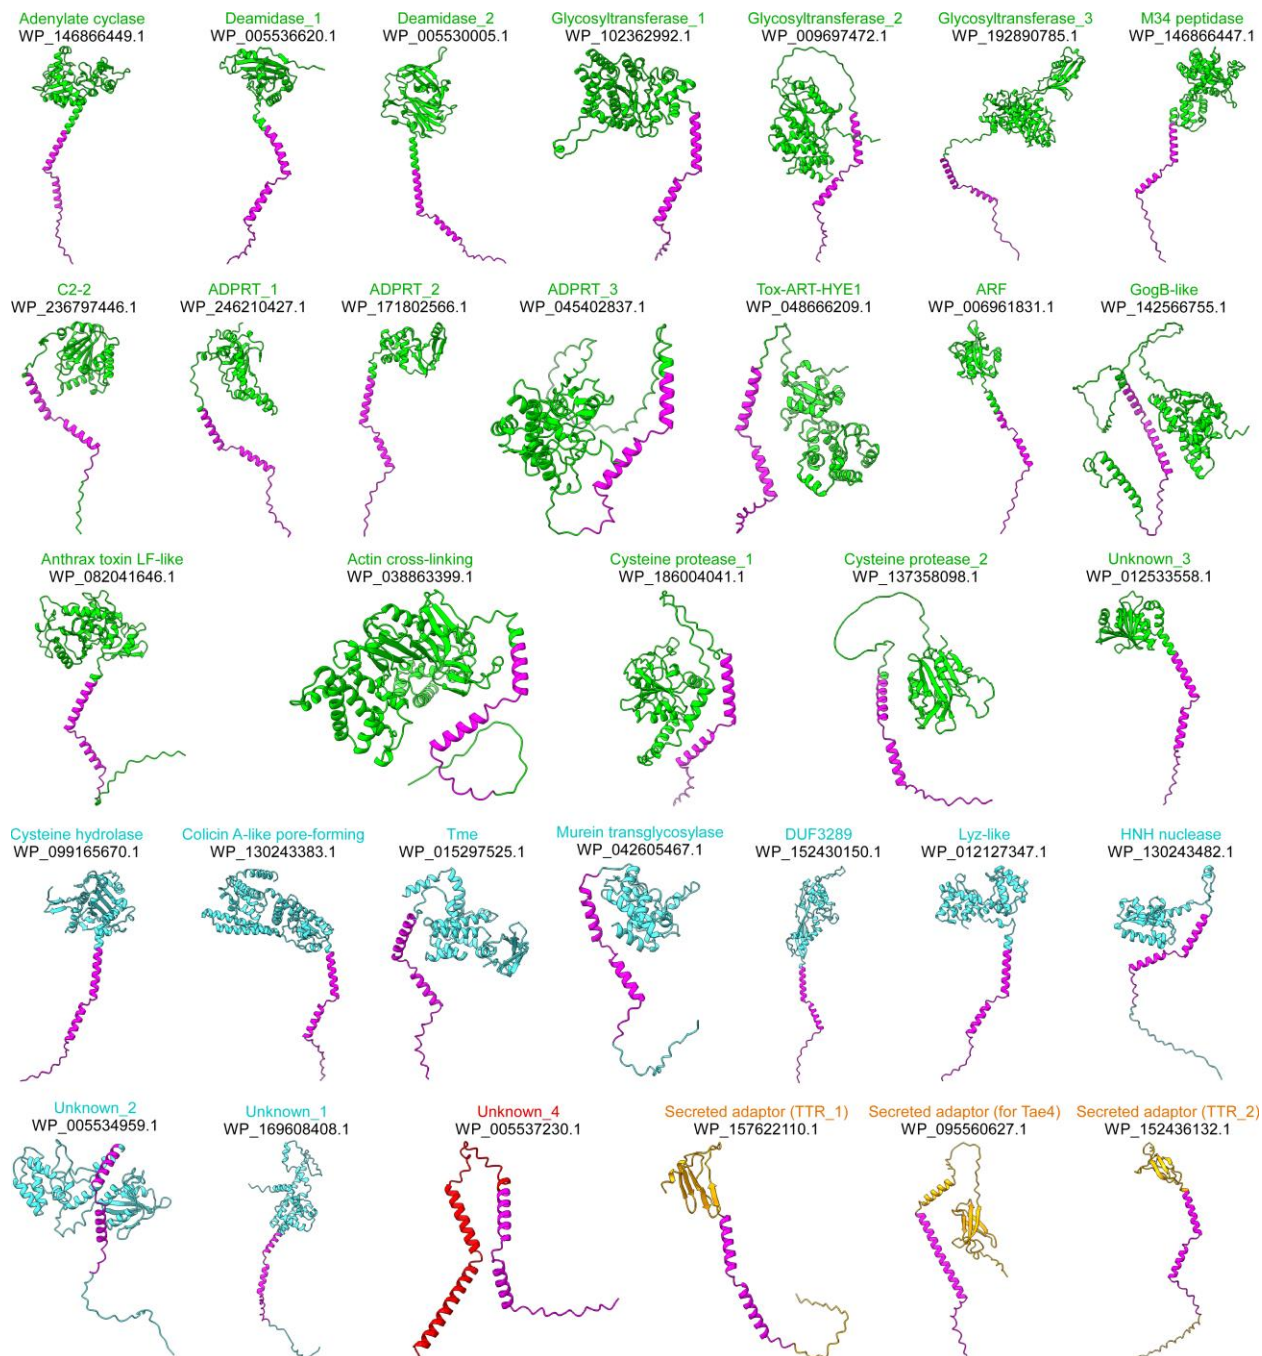

**Fig. S3. AlphaFold2 structure predictions of RIX cluster representatives.** The structures of a representative protein from 32 RIX C-termini clusters (excluding the “truncated” cluster) were predicted using AlphaFold2. The protein accession number and the predicted activity or domain are denoted above. Regions corresponding to RIX are denoted in magenta; proteins with predicted anti-eukaryotic activities are denoted in green; proteins with predicted antibacterial activities are denoted in cyan; proteins with predicted secreted adaptor activities are denoted in orange; C-terminal extensions with an unknown function are denoted in red. Lyz, lysozyme; ADPRT, ADP ribosyl transferase; ARF, ADP ribosylation factor; TTR, Transthyretin-like.

**a**

*V. campbellii* ATCC 25920 plasmid  
NZ\_CP015865.1; A8140\_RS24690-A8140\_RS24665

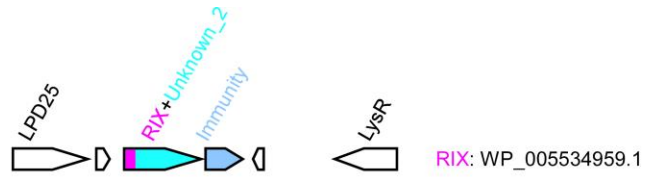

**b**

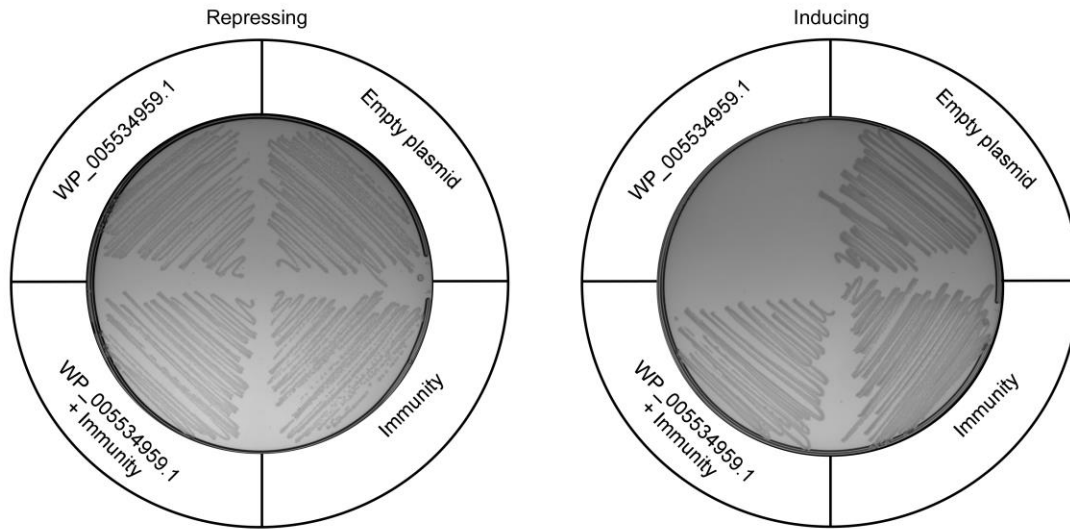

**Fig. S4. The RIX domain-containing WP\_005534959.1 is an antibacterial toxin. (a)** The genomic neighborhood of the gene encoding WP\_005534959.1 in *V. campbellii* ATCC 25920. The strain name, the GenBank accession number, and the locus tags are provided. Genes are denoted by arrows indicating the direction of transcription. The names of encoded proteins or domains are denoted above. **(b)** Toxicity of WP\_005534959.1 expressed from pBAD33.1<sup>F</sup>-based arabinose-inducible plasmids in *E. coli* BL21 (DE3), with or without its downstream-encoded predicted immunity protein. Bacteria were streaked onto repressing (4% wt/vol glucose) or inducing (0.05% wt/vol arabinose) agar plates. The experiment was repeated four independent times with similar results. Results from a representative experiment are shown.

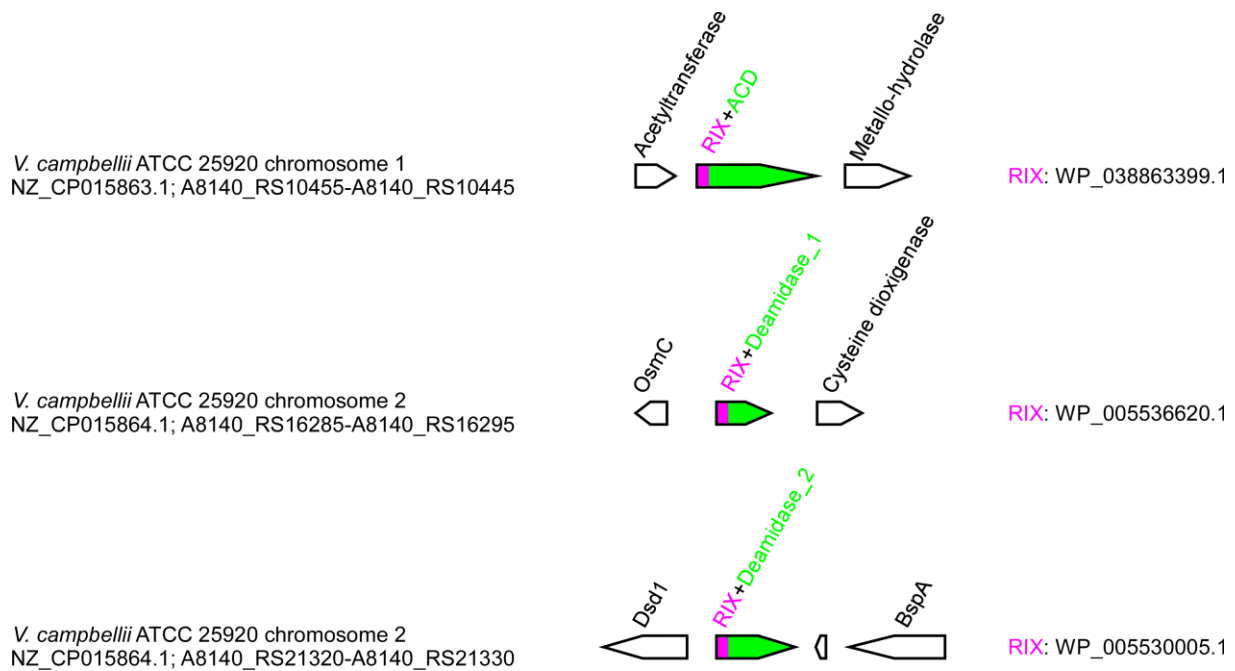

**Fig. S5. Three genes encoding RIX domain-containing proteins with predicted anti-eukaryotic activities in *V. campbellii*.** The genomic neighborhood of the genes encoding the indicated RIX domain-containing proteins in *V. campbellii* ATCC 25920. The strain name, the GenBank accession number, and the locus tags are provided. Genes are denoted by arrows indicating the direction of transcription. The names of encoded proteins or domains are denoted above. ACD, Actin cross-linking.

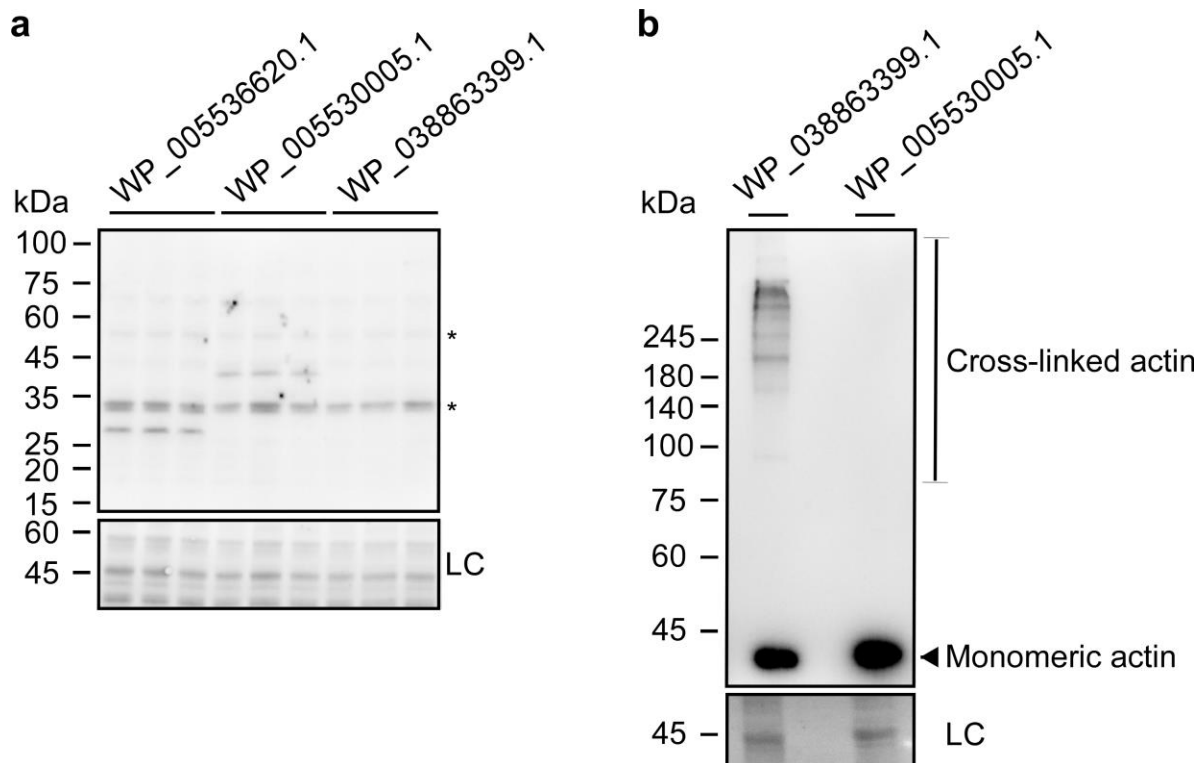

**Fig. S6. Expression of predicted anti-eukaryotic RIX domain-containing proteins in yeast. (a)** Expression of the indicated C-terminal Myc-tagged proteins from galactose-inducible plasmids in yeast. WP\_005536620.1 (deamidase\_1) is predicted to be a 28 kDa protein, WP\_005530005.1 (deamidase\_2) is predicted to be a 39 kDa protein, and WP\_038863399.1 (actin cross-linking) is predicted to be a 58 kDa protein. Lysates from three colonies for each expressed protein were used. Proteins were detected by immunoblotting using specific  $\alpha$ -Myc antibodies. Loading control (LC) is shown for total protein lysates. Asterisks denote non-specific bands detected by the  $\alpha$ -Myc antibody. **(b)** Actin forms found in lysates of yeast expressing the indicated proteins from a galactose-inducible plasmid were detected by immunoblotting using  $\alpha$ - $\beta$ -actin antibodies. Loading control (LC) is shown for total protein lysates. WP\_005530005.1 (deamidase\_2) was used as a non-actin cross-linking negative control. The experiments were repeated three independent times with similar results. Results from representative experiments are shown. Source data are provided as a Source Data file.

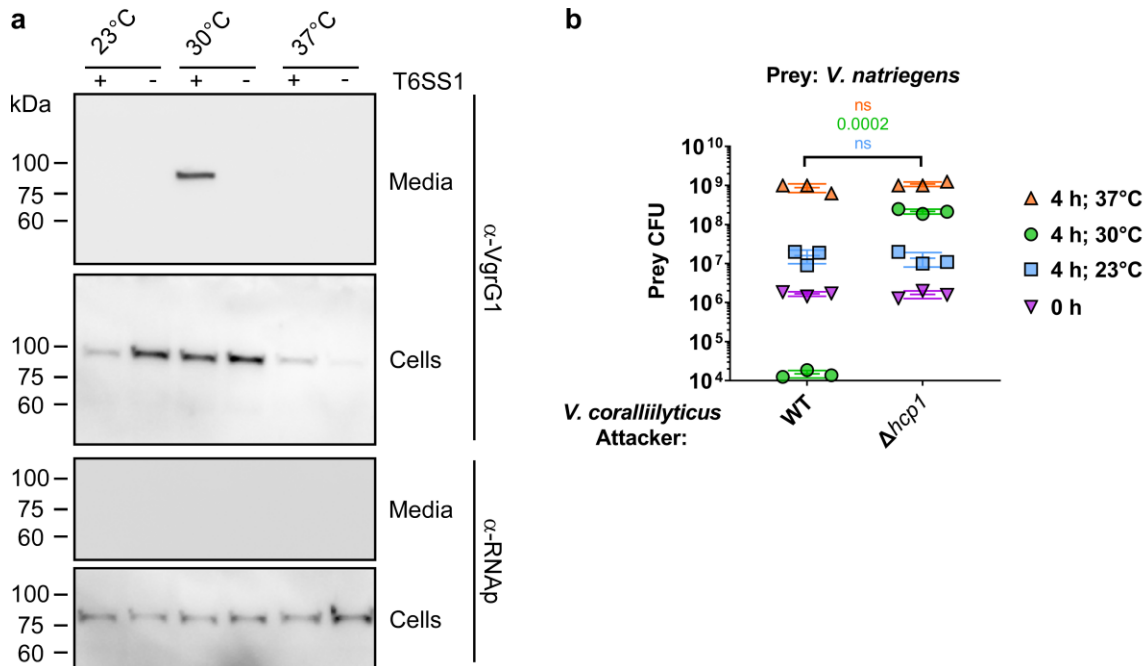

**Fig. S7. *V. coralliilyticus* T6SS1 mediates antibacterial toxicity under warm, marine-like conditions.** (a) Expression (cells) and secretion (media) of VgrG1 from *V. coralliilyticus* BAA-450 wild type (T6SS1<sup>+</sup>) or  $\Delta hcp1$  (T6SS1<sup>-</sup>) strains. Samples were grown in MLB media for 4 h at the indicated temperature. RNA polymerase sigma 70 (RNAP) was used as loading and lysis control. The experiment was repeated three independent times with similar results. Results from a representative experiment are shown. (b) Viability counts of *V. natriegens* prey before (0 h) and after (4 h) co-incubation with the indicated *V. coralliilyticus* BAA-450 attacker at the indicated temperature. The statistical significance between samples at the 4 h timepoint (color coded to match the relevant samples) was calculated using an unpaired, two-tailed Student's *t*-test; ns, no significant difference ( $p > 0.05$ ). Data are shown as the mean  $\pm$  SD;  $n = 3$  biological samples. The experiment was repeated three independent times with similar results. Results from a representative experiment are shown. WT, wild type. Source data are provided as a Source Data file.





**Fig. S8. Rte1 and Rti1 are an antibacterial effector and immunity pair.** **(a)** The structure of Rte1, either alone (top) or in complex with Rti1 (bottom) was predicted using AlphaFold2. Predicted active site residues are shown inside the green dashed rectangle. **(b)** The predicted aligned error of the complex shown in (a). A low predicted aligned error value indicates that the predicted relative position and orientation of two residues is well defined. **(c)** A conservation logo of Rte1 is illustrated using WebLogo3, based on multiple sequence alignment of Rte1 homologs. The position numbers correspond to the amino acids in Rte1. Predicted active site residues are denoted by a dashed rectangle, and color coded to match the residues shown in (a). **(d-e)** Growth of *E. coli* BL21 (DE3) containing plasmids for the arabinose-inducible expression of the indicated proteins. An arrow denotes the timepoint at which arabinose (0.05% wt/vol) was added to the media. In (d), Rte1 and Rti1 were expressed from separate plasmids (pBAD33.1<sup>F</sup> and pBAD<sup>K</sup>/Myc-His-based, respectively). Data are shown as the mean  $\pm$  SD; n = 4 biological samples. The experiments were repeated three independent times with similar results. Results from representative experiments are shown. **(f)** Expression of the indicated C-terminal FLAG tagged Rte1 forms from arabinose-inducible plasmids in *E. coli* BL21 (DE3) strains used in (d) and (e). Proteins were detected by immunoblotting using specific  $\alpha$ -FLAG antibodies. Loading control (LC) is shown for total protein lysates. The experiment was repeated three independent times with similar results. Results from a representative experiment are shown. Source data are provided as a Source Data file.

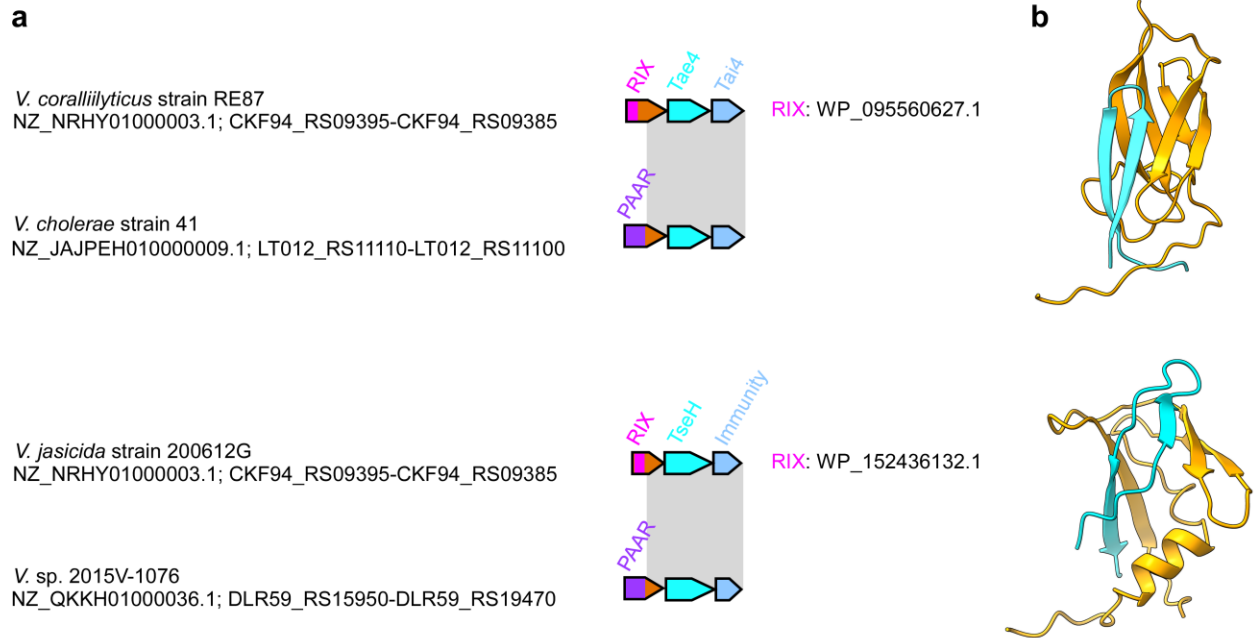

**Fig. S9. RIX domain-containing proteins can be secreted adaptors for cargo effector.** **(a)** The gene structure of the operons encoding WP\_095560627.1 in *V. coralliilyticus* RE87 and WP\_152436132.1 in *V. jasicida* 200612G. Operons encoding a module homologous to the C-terminal extension of the RIX domain-containing protein and the downstream-encoded effector and immunity pair are shown below; a gray rectangle denotes the region of homology. The strain names, the GenBank accession numbers, and the locus tags are provided. Genes are denoted by arrows indicating the direction of transcription. The names of encoded proteins or domains are denoted above. **(b)** Interactions between the RIX-containing proteins and their downstream-encoded effector were predicted by AlphaFold2. The interaction interfaces, corresponding to amino acids 102-185 of WP\_095560627.1 (orange) and 1-21 of Tae4 (cyan) (top), and amino acids 76-134 of WP\_152436132.1 (orange) and 1-24 of TseH (cyan) (bottom), are shown.

## Supplementary Tables

**Table S1. A list of bacterial strains used in this study.**

| Strain name                                                                                                                                                                 | Genotype                                                                                                    | Comments                                                                                                                                             | Source                               |
|-----------------------------------------------------------------------------------------------------------------------------------------------------------------------------|-------------------------------------------------------------------------------------------------------------|------------------------------------------------------------------------------------------------------------------------------------------------------|--------------------------------------|
| <i>Vibrio parahaemolyticus</i> BB22OP                                                                                                                                       | Wild type                                                                                                   | Used for generating deletion strains                                                                                                                 | Obtained from Kim Orth; <sup>1</sup> |
| <i>Vibrio parahaemolyticus</i> BB22OP $\Delta hns/\Delta tme1$                                                                                                              | $\Delta vpbb\_rs05425/$<br>$\Delta vpbb\_rs15030$                                                           | BB22OP derivative containing in-frame deletions of <i>hns</i> and <i>tme1</i> . Used for secretion assays                                            | <sup>2</sup>                         |
| <i>Vibrio parahaemolyticus</i> BB22OP $\Delta hns/\Delta tme1/\Delta hcp1$                                                                                                  | $\Delta vpbb\_rs05425/$<br>$\Delta vpbb\_rs15030/$<br>$\Delta vpbb\_rs06665$                                | BB22OP derivative containing in-frame deletions of <i>hns</i> , <i>tme1</i> , and <i>hcp1</i> . Used for secretion assays                            | <sup>2</sup>                         |
| <i>Vibrio parahaemolyticus</i> RIMD 2210633                                                                                                                                 | Wild type                                                                                                   | Used for generating deletion strains                                                                                                                 | Obtained from Kim Orth               |
| <i>Vibrio parahaemolyticus</i> RIMD 2210633 $\Delta hns/\Delta tdhAS/$<br>$\Delta vp\_rs06130/$<br>$\Delta vp\_rs06745/$<br>$vp\_rs06875^{AAA}$<br><br>(Surrogate attacker) | $\Delta vp\_rs05510/\Delta tdhAS/$<br>$\Delta vp\_rs06130/$<br>$\Delta vp\_rs06745/$<br>$vp\_rs06875^{AAA}$ | RIMD 2210633 derivative with a constitutively active, effectorless T6SS1. Used as a surrogate platform in competition assays and in secretion assays | <sup>3</sup>                         |
| <i>Vibrio parahaemolyticus</i> RIMD 2210633 $\Delta hns/\Delta tdhAS/$<br>$\Delta vp\_rs06130/$<br>$\Delta vp\_rs06745/$<br>$vp\_rs06875^{AAA}/\Delta hcp1$                 | Surrogate attacker $\Delta hcp1$                                                                            | Surrogate attacker derivative with an inactive T6SS1. Used as a surrogate platform in competition assays and in secretion assays                     | <sup>3</sup>                         |
| <i>Vibrio natriegens</i> ATCC 14048                                                                                                                                         | Wild type                                                                                                   | Used as prey in competition assays                                                                                                                   | ATCC collection                      |

|                                                             |                                                            |                                                                                                                                                     |                             |
|-------------------------------------------------------------|------------------------------------------------------------|-----------------------------------------------------------------------------------------------------------------------------------------------------|-----------------------------|
| <i>Vibrio coralliilyticus</i><br>ATCC BAA-450               | Wild type                                                  | Used for generating deletion strains, as the attacker in competition assays, and in secretion assays                                                | ATCC collection             |
| <i>Vibrio coralliilyticus</i><br>ATCC BAA-450 $\Delta hcp1$ | $\Delta vic_{rs16330}$                                     | ATCC BAA-450 derivative containing an in-frame deletion of <i>vic_rs16330</i> ; used as the attacker in competition assays, and in secretion assays | <sup>3</sup>                |
| <i>Vibrio campbellii</i> ATCC 25920                         | Wild type                                                  | Used for cloning                                                                                                                                    | ATCC collection             |
| <i>Escherichia coli</i> DH5 $\alpha$ ( $\lambda$ pir)       | K-12 derivative laboratory strain containing $\lambda$ pir | Used for plasmid maintenance and cloning                                                                                                            | Obtained from Eric V. Stabb |
| <i>Escherichia coli</i> BL21 (DE3)                          | Laboratory strain                                          | Used for protein expression and toxicity assays                                                                                                     | Obtained from Kim Orth      |

**Table S2. A list of plasmids used in this study.**

| Plasmid name               | Description                                                                                                                                                | Purpose                                                                                                        | Source       |
|----------------------------|------------------------------------------------------------------------------------------------------------------------------------------------------------|----------------------------------------------------------------------------------------------------------------|--------------|
| pBAD <sup>K</sup> /Myc-His | pBR322 ori-containing plasmid harboring a Kan <sup>R</sup> cassette, <i>araC</i> , and an MCS following a <i>Pbad</i> promoter                             | Used for arabinose-inducible expression                                                                        | <sup>4</sup> |
| pRti1 <sup>M</sup>         | pBAD <sup>K</sup> /Myc-His plasmid containing the CDS of WP_050778602.1 from <i>V. coralliilyticus</i> ATCC BAA-450 in frame with a C-terminal Myc-His tag | Used for the arabinose-inducible expression of WP_050778602.1 in <i>E. coli</i> and <i>V. parahaemolyticus</i> | This study   |
| pPER5                      | pBAD <sup>K</sup> /Myc-His with a PelB signal peptide inserted at the 5' end of the MCS                                                                    | Used for the arabinose-inducible expression of proteins targeted to the periplasm in <i>E. coli</i>            | <sup>5</sup> |
| pTme1 <sup>peri</sup>      | pPER5 plasmid containing the CDS                                                                                                                           | Used for the arabinose-inducible expression of                                                                 | <sup>2</sup> |

|                              |                                                                                                                                                                                                  |                                                                                                                           |              |
|------------------------------|--------------------------------------------------------------------------------------------------------------------------------------------------------------------------------------------------|---------------------------------------------------------------------------------------------------------------------------|--------------|
|                              | of Tme1 (WP_015297525.1) from <i>V. parahaemolyticus</i> BB22OP in frame with an N-terminal PelB signal peptide and the C-terminal Myc-His tag                                                   | Tme1 protein targeted to the periplasm in <i>E. coli</i>                                                                  |              |
| pTme1 <sup>61-310/peri</sup> | pPER5 plasmid containing the CDS of Tme1 <sup>61-310</sup> (truncation of the first 60 amino acids of Tme1) in frame with an N-terminal PelB signal peptide and a C-terminal Myc-His tag         | Used for the arabinose-inducible expression of Tme1 <sup>61-310</sup> protein targeted to the periplasm in <i>E. coli</i> | This study   |
| pTme1 <sup>1-225/peri</sup>  | pPER5 plasmid containing the CDS of Tme1 <sup>1-225</sup> (truncation of amino acids 226-310 of Tme1) in frame with an N-terminal PelB signal peptide and a C-terminal Myc-His tag               | Used for the arabinose-inducible expression of Tme1 <sup>1-225</sup> protein targeted to the periplasm in <i>E. coli</i>  | This study   |
| pBAD33.1 <sup>F</sup>        | pBAD33.1 with a FLAG tag inserted at the 3' end of the MCS                                                                                                                                       | Used for the arabinose-inducible expression of proteins                                                                   | <sup>2</sup> |
| pTme1 <sup>M</sup>           | pBAD33.1 <sup>F</sup> plasmid amplified without the FLAG tag, containing CDS of Tme1 in frame with the C-terminal Myc-His tag                                                                    | Used for the arabinose-inducible expression of proteins in <i>V. parahaemolyticus</i> BB22OP                              | This study   |
| pTme1 <sup>61-310M</sup>     | pBAD33.1 <sup>F</sup> plasmid amplified without the FLAG tag, containing CDS of Tme1 <sup>61-310</sup> (truncation of the first 60 amino acids of Tme1) in frame with the C-terminal Myc-His tag | Used for the arabinose-inducible expression of proteins in <i>V. parahaemolyticus</i> BB22OP                              | This study   |

|                                   |                                                                                                                                                                                                  |                                                                                              |              |
|-----------------------------------|--------------------------------------------------------------------------------------------------------------------------------------------------------------------------------------------------|----------------------------------------------------------------------------------------------|--------------|
| sfGFP-N1                          | Eukaryotic expression plasmid encoding superfolder GFP (sfGFP)                                                                                                                                   | Used as a template to amplify <i>sfgfp</i>                                                   | Addgene      |
| pTme1 <sup>1-60</sup> -sfGFP      | pBAD33.1 <sup>F</sup> plasmid containing CDS for Tme1 <sup>1-60</sup> (the first 60 amino acids of Tme1) fused to sfGFP, in frame with the C-terminal FLAG tag of the plasmid                    | Used for the arabinose-inducible expression of proteins in <i>V. parahaemolyticus</i> BB22OP | This study   |
| psfGFP                            | pBAD33.1 <sup>F</sup> plasmid containing CDS of sfGFP in frame with the C-terminal FLAG tag of the plasmid                                                                                       | Used for the arabinose-inducible expression of proteins in <i>V. parahaemolyticus</i> BB22OP | <sup>6</sup> |
| pWP_005536620.1                   | pBAD33.1 <sup>F</sup> plasmid containing CDS of WP_005536620.1 from <i>V. campbellii</i> ATCC 25920 in frame with the C-terminal FLAG tag of the plasmid                                         | Used for the arabinose-inducible expression of proteins in <i>V. parahaemolyticus</i>        | This study   |
| pWP_005536620.1 <sup>64-241</sup> | pBAD33.1 <sup>F</sup> plasmid containing CDS of WP_005536620.1 <sup>64-241</sup> (truncation of the first 63 amino acids of WP_005536620.1) in frame with the C-terminal FLAG tag of the plasmid | Used for the arabinose-inducible expression of proteins in <i>V. parahaemolyticus</i>        | This study   |
| pWP_005530005.1                   | pBAD33.1 <sup>F</sup> plasmid containing CDS of WP_005530005.1 from <i>V. campbellii</i> ATCC 25920 in frame with the C-terminal FLAG tag of the plasmid                                         | Used for the arabinose-inducible expression of proteins in <i>V. parahaemolyticus</i>        | This study   |
| pWP_005530005.1 <sup>65-338</sup> | pBAD33.1 <sup>F</sup> plasmid containing CDS of WP_005530005.1 <sup>65-338</sup> (truncation of the first 64 amino acids of                                                                      | Used for the arabinose-inducible expression of proteins in <i>V. parahaemolyticus</i>        | This study   |

|                                   |                                                                                                                                                                                                  |                                                                                                          |            |
|-----------------------------------|--------------------------------------------------------------------------------------------------------------------------------------------------------------------------------------------------|----------------------------------------------------------------------------------------------------------|------------|
|                                   | WP_005530005.1)<br>in frame with the C-terminal FLAG tag of the plasmid                                                                                                                          |                                                                                                          |            |
| pWP_038863399.1                   | pBAD33.1 <sup>F</sup> plasmid containing CDS of WP_038863399.1 from <i>V. campbellii</i> ATCC 25920 in frame with the C-terminal FLAG tag of the plasmid                                         | Used for the arabinose-inducible expression of proteins in <i>V. parahaemolyticus</i>                    | This study |
| pWP_038863399.1 <sup>66-526</sup> | pBAD33.1 <sup>F</sup> plasmid containing CDS of WP_038863399.1 <sup>66-526</sup> (truncation of the first 65 amino acids of WP_038863399.1) in frame with the C-terminal FLAG tag of the plasmid | Used for the arabinose-inducible expression of proteins in <i>V. parahaemolyticus</i>                    | This study |
| pEffector                         | pBAD33.1 <sup>F</sup> plasmid containing CDS of WP_005534959.1 from <i>V. campbellii</i> ATCC 25920 in frame with the C-terminal FLAG tag of the plasmid                                         | Used for the arabinose-inducible expression of proteins in <i>E. coli</i> and <i>V. parahaemolyticus</i> | This study |
| pEffector+Immunity                | pBAD33.1 <sup>F</sup> plasmid containing CDS of WP_005534959.1 and WP_005534960.1 from <i>V. campbellii</i> ATCC 25920 in frame with the C-terminal FLAG tag of the plasmid                      | Used for the arabinose-inducible expression of proteins in <i>E. coli</i> and <i>V. parahaemolyticus</i> | This study |
| pImmunity                         | pBAD33.1 <sup>F</sup> plasmid containing CDS of WP_005534960.1 in frame with the C-terminal FLAG tag of the plasmid                                                                              | Used for the arabinose-inducible expression of proteins in <i>E. coli</i> and <i>V. parahaemolyticus</i> | This study |
| pRIX                              | pBAD33.1 <sup>F</sup> plasmid containing CDS of WP_157622110.1 from <i>V. coralliilyticus</i>                                                                                                    | Used for the arabinose-inducible expression of proteins in <i>V.</i>                                     | This study |



|                             |                                                                                                                                                                                                                  |                                                                                                                                 |            |
|-----------------------------|------------------------------------------------------------------------------------------------------------------------------------------------------------------------------------------------------------------|---------------------------------------------------------------------------------------------------------------------------------|------------|
|                             | ATCC BAA-450 in frame with the C-terminal FLAG tag of the plasmid                                                                                                                                                | <i>coralliilyticus</i> and <i>V. parahaemolyticus</i>                                                                           |            |
| pRte1                       | pBAD33.1 <sup>F</sup> plasmid containing CDS of WP_006958655.1 from <i>V. coralliilyticus</i> ATCC BAA-450 in frame with the C-terminal FLAG tag of the plasmid                                                  | Used for the arabinose-inducible expression of proteins in <i>E. coli</i>                                                       | This study |
| pRte1 <sup>H94A</sup>       | pBAD33.1 <sup>F</sup> plasmid containing CDS of WP_006958655.1 from <i>V. coralliilyticus</i> ATCC BAA-450 with a substitution of histidine 94 for alanine, in frame with the C-terminal FLAG tag of the plasmid | Used for the arabinose-inducible expression of proteins in <i>E. coli</i> and the secretion assay in <i>V. parahaemolyticus</i> | This study |
| pRte1 <sup>S106A</sup>      | pBAD33.1 <sup>F</sup> plasmid containing CDS of WP_006958655.1 from <i>V. coralliilyticus</i> ATCC BAA-450 with a substitution of serine 106 with alanine, in frame with the C-terminal FLAG tag of the plasmid  | Used for the arabinose-inducible expression of proteins in <i>E. coli</i>                                                       | This study |
| pRIX+Rtei1                  | pBAD33.1 <sup>F</sup> plasmid containing CDS of WP_157622110.1, WP_006958655.1, and WP_050778602.1 from <i>V. coralliilyticus</i> ATCC BAA-450 in frame with the C-terminal FLAG tag of the plasmid              | Used for the arabinose-inducible expression of proteins in <i>V. parahaemolyticus</i>                                           | This study |
| pRIX <sup>1-69</sup> +Rtei1 | pRIX+Rtei1 in which the codon for amino acid 70 of WP_157622110.1                                                                                                                                                | Used for the arabinose-inducible expression of proteins in <i>V. parahaemolyticus</i>                                           | This study |

|                               |                                                                                                                                                                                                                                     |                                                                                       |            |
|-------------------------------|-------------------------------------------------------------------------------------------------------------------------------------------------------------------------------------------------------------------------------------|---------------------------------------------------------------------------------------|------------|
|                               | was replaced by a stop codon                                                                                                                                                                                                        |                                                                                       |            |
| pRIX <sup>65-134</sup> +Rtei1 | pBAD33.1 <sup>F</sup> plasmid containing CDS of WP_157622110.1 <sup>65-134</sup> (truncation of the first 64 amino acids of WP_157622110.1) WP_006958655.1, and WP_050778602.1 in frame with the C-terminal FLAG tag of the plasmid | Used for the arabinose-inducible expression of proteins in <i>V. parahaemolyticus</i> | This study |
| pRIX+Rte1 <sup>H94A</sup>     | pBAD33.1 <sup>F</sup> plasmid containing CDS of WP_157622110.1 and WP_006958655.1 with a H94A mutation from <i>V. coralliilyticus</i> ATCC BAA-450 in frame with the C-terminal FLAG tag of the plasmid                             | Used for the arabinose-inducible expression of proteins in <i>V. parahaemolyticus</i> | This study |
| pRtei1                        | pBAD33.1 <sup>F</sup> plasmid containing CDS of WP_006958655.1 and WP_050778602.1 from <i>V. coralliilyticus</i> ATCC BAA-450 in frame with the C-terminal FLAG tag of the plasmid                                                  | Used for the arabinose-inducible expression of proteins in <i>V. parahaemolyticus</i> | This study |
| pGML10                        | pGML10 <i>E. coli</i> - <i>S. cerevisiae</i> shuttle vector, GAL1-10 promoter with a Myc tag at the 3' end of the MCS                                                                                                               | Used for the galactose-inducible expression of proteins in <i>S. cerevisiae</i>       | Riken      |
| pGML10:eGFP                   | pGML10 containing the CDS of enhanced GFP in the EcoRI site of the MCS, in frame with the C-terminal Myc tag of the plasmid                                                                                                         | Used for the galactose-inducible expression of eGFP in <i>S. cerevisiae</i>           | This study |

|                       |                                                                                                 |                                                                                 |            |
|-----------------------|-------------------------------------------------------------------------------------------------|---------------------------------------------------------------------------------|------------|
| pGML10:WP_005536620.1 | pGML10 containing the CDS of WP_005536620.1 in frame with the C-terminal Myc tag of the plasmid | Used for the galactose-inducible expression of proteins in <i>S. cerevisiae</i> | This study |
| pGML10:WP_005530005.1 | pGML10 containing the CDS of WP_005530005.1 in frame with the C-terminal Myc tag of the plasmid | Used for the galactose-inducible expression of proteins in <i>S. cerevisiae</i> | This study |
| pGML10:WP_038863399.1 | pGML10 containing the CDS of WP_038863399.1 in frame with the C-terminal Myc tag of the plasmid | Used for the galactose-inducible expression of proteins in <i>S. cerevisiae</i> | This study |

**Table S3. Primer pairs used in this study to construct plasmids.**

| Primer name                       | Sequence (5'->3') <sup>a</sup>                          | Comments                                                                                                                    |
|-----------------------------------|---------------------------------------------------------|-----------------------------------------------------------------------------------------------------------------------------|
| WP_050778602_pBAD <sup>M</sup> _F | cgctgcatccttgaatcCGTTCTTTCTTCTATAAACTC                  | Used to amplify the WP_050778602.1 CDS to construct pRti1 <sup>M</sup>                                                      |
| WP_050778602_pBAD <sup>M</sup> _R | ttttgttcgggccaagcttCGTTCTTTCTTCTATAAAC TC               |                                                                                                                             |
| Tme1 <sup>61-310</sup> _PER_F     | cccagccggcgatggccATCTCTCAAGGTTTAAAAA C                  | Used to amplify the CDS of Tme1 amino acids 61-310 to construct pTme1 <sup>61-310/peri</sup>                                |
| Tme1_PER_R                        | ttttgttcgggccaagcttTATCGCACTTTCTAACCTT TCAACTATCGTTTGAG |                                                                                                                             |
| Tme1_PER_F                        | cccagccggcgatggccATGAGATATGAATCCGCT CCTGTAGCCCC         | Used to amplify the CDS of Tme1 amino acids 1-225 to construct pTme1 <sup>1-225/peri</sup>                                  |
| Tme1 <sup>1-225</sup> _PER_R      | ttttgttcgggccaagcttCGCCGATACAACAAACGT TAAAACTCC         |                                                                                                                             |
| Tme1_BAD_F                        | ctttaagaaggagatatacatATGAGATATGAATCCGC TCCTGTAGCCCC     | Used to amplify the CDS of Tme1 to construct pTme1 <sup>M</sup>                                                             |
| Tme1_Myc_R                        | ttttgttcgggccaagcttTATCGCACTTTCTAACCTT TC               |                                                                                                                             |
| Tme1 <sup>61-310</sup> _BAD_F     | ctttaagaaggagatatacatATGATCTCTCAAGGTTT AAAAACGCC        | Used to amplify the CDS of amino acids 61-310 of Tme1 together with primer Tme1_Myc_R to construct pTme1 <sup>61-310M</sup> |
| Tme1 <sup>1-60</sup> _linker_R    | accaccagcagcagcTTGACCTAATCCAGC                          | Used to amplify the CDS of Tme1 amino acids 1-60 together                                                                   |

|                                         |                                                       |                                                                                                                                                               |
|-----------------------------------------|-------------------------------------------------------|---------------------------------------------------------------------------------------------------------------------------------------------------------------|
|                                         |                                                       | with primer Tme1_BAD_F to construct pTme1 <sup>1-60</sup> -sfGFP                                                                                              |
| sfGFP_linker_F                          | gctgctgctggtggtggtATGGTGAGCAAGGGCGAGGAG               | Used to amplify the CDS of sfGFP together with a linker sequence to construct pTme1 <sup>1-60</sup> -sfGFP                                                    |
| sfGFP_BAD_R                             | cgtcgcatccttgtaatcCTTGTACAGCTCGTCCATGCCG              |                                                                                                                                                               |
| WP_005536620.1_BAD_F                    | ctttaagaaggagatatacatATGAGATATGAATCCGCTCCTGTAGC       | Used to amplify the CDS of WP_005536620.1 to construct pWP_005536620.1                                                                                        |
| WP_005536620.1_BAD_R                    | cgtcgcatccttgtaatcGAAGCACTTCATGCTACTTTC               |                                                                                                                                                               |
| WP_005536620.1 <sub>64-241</sub> _BAD_F | ctttaagaaggagatatacatATGGTAACAGCTAAGCTCCACCC          | Used to amplify the CDS of WP_005536620.1 CDS for amino acids 64-241 together with primer WP_005536620.1_BAD_R to construct pWP_005536620.1 <sup>64-241</sup> |
| WP_005530005.1_BAD_F                    | ctttaagaaggagatatacatATGCGATATCAATCAGCGCC             | Used to amplify the CDS of WP_005530005.1 to construct pWP_005530005.1                                                                                        |
| WP_005530005.1_BAD_R                    | cgtcgcatccttgtaatcGCGCTTTATCGCGATGGTTC                |                                                                                                                                                               |
| WP_005530005.1 <sub>65-338</sub> _BAD_F | ctttaagaaggagatatacatATGGCCGCGACAGAACAGAAAAACCATATTAC | Used to amplify the CDS of WP_005530005.1 CDS for amino acids 65-338 together with primer WP_005530005.1_BAD_R to construct pWP_005530005.1 <sup>65-338</sup> |
| WP_038863399.1_BAD_F                    | ctttaagaaggagatatacatATGCCTAATCTTGATGAC               | Used to amplify the CDS of WP_038863399.1 to construct pWP_038863399.1                                                                                        |
| WP_038863399.1_BAD_R                    | cgtcgcatccttgtaatcACCTCGTTTTTGGAGAGCTATTAG            |                                                                                                                                                               |
| WP_038863399.1 <sub>66-526</sub> _BAD_F | ctttaagaaggagatatacatATGCGTGAGCGAGCGGCTCAG            | Used to amplify the CDS of WP_038863399.1 CDS for amino acids 66-526 together with primer                                                                     |

|                    |                                                              |                                                                                                                                                                                                                                                             |
|--------------------|--------------------------------------------------------------|-------------------------------------------------------------------------------------------------------------------------------------------------------------------------------------------------------------------------------------------------------------|
|                    |                                                              | WP_038863399.1_B<br>AD_R to construct<br>pWP_038863399.1 <sup>66-526</sup>                                                                                                                                                                                  |
| Effector_BAD_F     | ctttaagaaggagatatacatATGTCGAATAGTTCTGA<br>TAATAATAAACTGTCAGC | Used to amplify the<br>CDS of<br>WP_005534959.1 to<br>construct pEffector                                                                                                                                                                                   |
| Effector_BAD_R     | cgtcgcatccttgaatcTTTAATTACTTTTCCTGAAC                        |                                                                                                                                                                                                                                                             |
| Immunity_BAD_F     | ctttaagaaggagatatacatATGTCGAATAGTTCTGA<br>TAATAATAAACTGTCAGC | Used to amplify the<br>CDS of<br>WP_005534960.1 to<br>construct pImmunity.<br>Effector_BAD_F was<br>used together with<br>Immunity_BAD_R to<br>amplify the CDS of<br>WP_005534959.1<br>and<br>WP_005534960.1<br>together to construct<br>pEffector+Immunity |
| Immunity_BAD_R     | cgtcgcatccttgaatcTGACTGTGAAGCTCTCTC                          |                                                                                                                                                                                                                                                             |
| RIX_BAD_F          | ctttaagaaggagatatacatATGGTGACGATTTACAA<br>TAAAAAC            | Used to amplify<br>inserts containing the<br>CDS of<br>WP_157622110.1 to<br>construct pRIX,<br>pRIX+Rtei1, pRIX <sup>1-69</sup> +Rtei1, and<br>pRIX+Rtei1 <sup>H94A</sup>                                                                                   |
| RIX_BAD_R          | cgtcgcatccttgaatcGTCATGCCACCTCTCCAAT<br>G                    | Used to amplify the<br>CDS of<br>WP_157622110.1 to<br>construct pRIX                                                                                                                                                                                        |
| Rte1_BAD_F         | cccagccggcgatggccATGACTGATACGCTATTCA<br>ATACAACTATGG         | Used to amplify<br>inserts containing the<br>CDS of<br>WP_006958655.1 to<br>construct pRte1,<br>pRte1 <sup>H94A</sup> , pRte1 <sup>S106A</sup> ,<br>and pRte1                                                                                               |
| Rte1_BAD_R         | cgtcgcatccttgaatcGTTTTCATAAATAAAATCCG<br>C                   | Used to amplify<br>inserts containing the<br>CDS of<br>WP_006958655.1 to<br>construct pRte1,<br>pRte1 <sup>H94A</sup> , and<br>pRte1 <sup>S106A</sup>                                                                                                       |
| Rte1_H94A_F_K<br>Z | CAAAAGCAAGTGTTGCTGAGGCTGTCATG                                | Used to amplify a<br>H94A mutated                                                                                                                                                                                                                           |

|                              |                                                    |                                                                                                                                                              |
|------------------------------|----------------------------------------------------|--------------------------------------------------------------------------------------------------------------------------------------------------------------|
| Rte1_H94A_R_KZ               | CATGACAGCCTCAGCAACACTTGCTTTTG                      | version of WP_006958655.1                                                                                                                                    |
| Rte1_S106A_F_KZ              | CACTAAATCTCGGTTGCTTgctACGAGCTCAACC                 | Used to amplify a S106A mutated version of WP_006958655.1                                                                                                    |
| Rte1_S106A_R_KZ              | GGTTGAGCTCGTAGCAAagcACCGAGATTTA GTG                |                                                                                                                                                              |
| Rti1_BAD_R                   | cgctgcatccttgaatcCGTTCTTTCTTCTATAAACTC             | Used to amplify inserts containing the CDS of WP_050778602.1 to construct pRIX+Rtei1, pRtei1, pRIX <sup>1-69</sup> +Rtei1, and pRIX <sup>65-134</sup> +Rtei1 |
| RIX <sup>70stop</sup> _F     | CGCGAGTATTGGCATCTAGAtaaGTGGATCAA CAAATGAG          | Used to amplify a mutated version of WP_157622110.1 with a stop codon replacing the codon for amino acid 70, to construct pRIX <sup>1-69</sup> +Rtei1        |
| RIX <sup>70stop</sup> _R     | CTCATTGTTGATCCACttaTCTAGATGCCAAT ACTCGCG           |                                                                                                                                                              |
| RIX <sup>65-134</sup> _BAD_F | ctttaagaaggagatatacatATGGTATTGGCATCTAG AATG        | Used to amplify a truncated version of WP_157622110.1 starting with the codon for amino acid 65, to construct pRIX <sup>65-134</sup> +Rtei1                  |
| WP_005536620.1_pGML_F        | accccgatcgaattgactctagaATGAGATATGAATC CGCTCCTGTAGC | Used to amplify the CDS of WP_005536620.1 to construct pGML10:WP_005536620.1                                                                                 |
| WP_005536620.1_pGML_R        | ttctgtcagaatt GTCATGCCACCTCTCCAATG                 |                                                                                                                                                              |
| WP_005530005.1_pGML_F        | accccgatcgaattgactctagaATGCGATATCAATC AGC          | Used to amplify the CDS of WP_005530005.1 to construct pGML10:WP_005530005.1                                                                                 |
| WP_005530005.1_pGML_R        | ttctgtcagaattGCGCTTTATCGCGATGGTTC                  |                                                                                                                                                              |
| WP_038863399.1_pGML_F        | accccgatcgaattgactctagaATGCCTAATCTTGAT GAACTAAAAG  | Used to amplify the CDS of WP_038863399.1 to construct pGML10:WP_038863399.1                                                                                 |
| WP_038863399.1_pGML_R        | ttctgtcagaattACCTCGTTTTTGAGAGCTATTAG ATGACG        |                                                                                                                                                              |
| pGML10_Gib_F                 | aattctgaacagaaactgattccgaagaggatctg                | Used to amplify the pGML10 plasmid                                                                                                                           |
| pGML10_Gib_R                 | tctagagtcaattcgatccggggt                           |                                                                                                                                                              |

|                 |                                                    |                                                                                                                                        |
|-----------------|----------------------------------------------------|----------------------------------------------------------------------------------------------------------------------------------------|
|                 |                                                    | backbone for Gibson assembly                                                                                                           |
| pBAD33.1F_Gib_F | GATTACAAGGATGACGACGataagtgaaagcttggc<br>tgtttggcgg | Used to amplify the pBAD33.1 plasmid backbone with a C-terminal FLAG tag for Gibson assembly                                           |
| pBAD33.1F_Gib_R | catatgtatatctccttcttaagttaacaaaattattctagag        |                                                                                                                                        |
| pBAD33.1M_Gib_F | ACAAAAACTCATCTCAGAAGAGGATCTGtgaa<br>agcttggctgtttg | Used to amplify the pBAD33.1 plasmid backbone with a C-terminal Myc-His tag for Gibson assembly (together with primer pBAD33.1F_Gib_F) |
| pPER5_Gib_F     | aagcttgggcccgaacaaaaac                             | Used to amplify the pPER5 plasmid backbone for Gibson assembly                                                                         |
| pPER5_Gib_R     | ggccatcgccggctgggcagcg                             |                                                                                                                                        |

<sup>a</sup> Uppercase letters correspond to gene sequences; lowercase letters correspond to plasmid sequences

## References

1. McCarter, L. L. OpaR, a homolog of *Vibrio harveyi* LuxR, controls opacity of *Vibrio parahaemolyticus*. *J Bacteriol* **180**, (1998).
2. Fridman, C. M., Keppel, K., Gerlic, M., Bosis, E. & Salomon, D. A comparative genomics methodology reveals a widespread family of membrane-disrupting T6SS effectors. *Nat Commun* **11**, 1085 (2020).
3. Jana, B., Keppel, K., Fridman, C. M., Bosis, E. & Salomon, D. Multiple T6SSs, Mobile Auxiliary Modules, and Effectors Revealed in a Systematic Analysis of the *Vibrio parahaemolyticus* Pan-Genome. *mSystems* (2022) doi:10.1128/MSYSTEMS.00723-22.
4. Salomon, D., Gonzalez, H., Updegraff, B. L. & Orth, K. *Vibrio parahaemolyticus* Type VI secretion system 1 is activated in marine conditions to target bacteria, and is differentially regulated from system 2. *PLoS One* **8**, e61086 (2013).
5. Dar, Y., Salomon, D. & Bosis, E. The antibacterial and anti-eukaryotic Type VI secretion system MIX-effector repertoire in Vibrionaceae. *Mar Drugs* **16**, 433 (2018).
6. Dar, Y., Jana, B., Bosis, E. & Salomon, D. A binary effector module secreted by a type VI secretion system. *EMBO Rep* **23**, e53981 (2022).
