# Supplementary material for: The RIX domain defines a class of polymorphic T6SS effectors and secreted adaptors
Source: PubMed Central journal article supplement (PMC10435454; doi:10.1038/s41467-023-40659-2), 2023-08-17
Supplement: 41467_2023_40659_MOESM3_ESM.pdf [file 41467_2023_40659_MOESM3_ESM.pdf]

## **Description of Additional Supplementary Files:**

**Supplementary Data 1:** RIX domain-containing proteins identified in this study.

**Supplementary Data 2:** The presence of T6SS in RIX domain-encoding bacterial genomes.

**Supplementary Data 3:** AlphaFold2-generated PDB files used in this study.
